# Supplementary material for: Mondegreens and Soramimi as a Method to Induce Misperceptions of Speech Content – Influence of Familiarity, Wittiness, and Language Competence
Source: PLoS One. 2014 Jan 8;9(1):e84667. doi: 10.1371/journal.pone.0084667 (PMC3885583; doi:10.1371/journal.pone.0084667)
Supplement: Data S1 — The supplemental data file includes information on analog data of the study participants as well as data analyses according to the subjects and stimuli (familiarity with the song text, familiarity with misperceptions, strength of misperceptions, wittiness uncorrected and corrected). (XLSX) [file pone.0084667.s001.xlsx]

## Sheet: analog data
	age	sex	years of school education	graduation	professional education	academic studies	second academic studies	total professional and academic studies	years of education (= school education plus total of professional and academic studies)	medicaments	right handedness (max = 20)	verbal intelligence test (max = 37)	verbal IQ	Mini-Toefl (max = 25)
subject 001	27	w	13	A levels (German Abitur)	apprenticeship +	8. term	0	7	20	0	19	31	112	20
subject 002	29	w	13	A levels (German Abitur)	0	8. term	0	4	17	L-Thyroxin 100	20	30	107	14
subject 003	26	w	13	A levels (German Abitur)	0	8. term	0	4	17	0	20	31	112	17
subject 004	28	w	13	A levels (German Abitur)	0	10 terms	8. term	9	22	0	20	33	124	21
subject 005	22	w	13	A levels (German Abitur)	0	4. term	0	2	15	0	16	32	118	21
subject 006	25	w	13	A levels (German Abitur)	0	8. term	0	4	17	0	18	32	118	19
subject 007	29	m	13	A levels (German Abitur)	apprenticeship +	8. term	0	7	20	0	19	31	112	18
subject 008	31	m	13	A levels (German Abitur)	0	10 terms	0	5	18	0	20	30	107	20
subject 009	23	w	13	A levels (German Abitur)	0	8. term	0	4	17	0	18	31	112	21
subject 010	25	m	13	A levels (German Abitur)	0	8. term	0	4	17	0	18	33	124	21
subject 011	24	m	11	General Certificate of Secondary Education (German Realschule)	0	0	0	0	11	0	20	36	143	14
subject 012	27	m	13	A levels (German Abitur)	apprenticeship +	0	0	3	16	Omeprazol, Citerizin	19	34	130	20
subject 013	24	w	13	A levels (German Abitur)	0	8. term	0	4	17	0	19	31	112	19
subject 014	23	m	13	A levels (German Abitur)	0	6. term	0	3	16	0	19	31	112	18
subject 015	44	m	13	A levels (German Abitur)	0	10 terms	0	5	18	0	18	32	118	16
subject 016	23	m	13	A levels (German Abitur)	0	8. term	0	4	17	0	18	33	124	14
subject 017	28	w	11	General Certificate of Secondary Education (German Realschule)	apprenticeship +	0	0	3	14	0	14	28	101	11
subject 018	47	w	9	secondary modern school (German Hauptschule)	apprenticeship +	0	0	3	12	0	18	31	112	7
subject 019	34	m	14	advanced technical college entrance qualification (German FH-Reife)	2 apprenticeships	0	0	6	20	0	16	29	104	12
subject 020	37	m	14	advanced technical college entrance qualification (German FH-Reife)	apprenticeship +	0	0	3	17	0	18	29	104	9
subject 021	32	w	11	General Certificate of Secondary Education (German Realschule)	apprenticeship +	0	0	3	14	0	20	29	104	11
subject 022	22	m	11	General Certificate of Secondary Education (German Realschule)	apprenticeship +	0	0	3	14	0	14	23	93	7
subject 023	21	w	11	General Certificate of Secondary Education (German Realschule)	0	0	0	0	11	0	19	23	93	5
avg	28.3043		12.4783					3.91304	16.3913	avg
									23	n
									7.62949	var
					apprenticeship = 3 years				2.76215	std
											transformation verbal intelligence testing ("Mehrworttest") into verbal-IQ
											total in points	percentage	verbal IQ
											0	0.4	61
											1	0.8	64
											2	0.9	65
											3	1	66
											4	1.3	67
											5	2.4	70
											6	3.9	73
											7	4.7	74
											8	5.1	76
											9	5.7	76
											10	6.4	77
											11	7.3	78
											12	8.1	79
											13	9.1	80
											14	10.3	81
											15	12	82
											16	14	83
											17	16.1	85
											18	18.2	86
											19	20.7	88
											20	23.4	89
											21	26.2	91
											22	29.2	92
											23	32.5	93
											24	35.8	94
											25	39.2	95
											26	43.5	97
											27	48.9	100
											28	55	101
											29	62.2	104
											30	71.1	107
											31	80.6	112
											32	88.6	118
											33	94.3	124
											34	97.7	130
											35	99.2	136
											36	99.8	143
											37	99.9	145

## Sheet: data according to subject
			familiarity text						familiarity misperception						strength of induced misperceptions						wittiness uncorrected						wittiness corrected (only the misperceived ones)
			n	sum	avg	var	std		n	sum	avg	var	std		n	sum	avg	var	std		n	sum	avg	var	std		n	sum	avg	var	std	ste
subject 001	total		61	156	2.55738	0.607364	0.779335		61	66	1.08197	0.0752486	0.274315		61	96	1.57377	1.09702	1.04739		61	93	1.52459	0.839559	0.916275		17	49	2.88235	0.456747	0.675831	0.140921
subject 002	total		61	138	2.2623	0.882021	0.93916		61	61	1	0	0		59	76	1.28814	0.442402	0.665133		58	74	1.27586	0.441141	0.664185		11	27	2.45455	0.61157	0.78203	0.163065
subject 003	total		60	144	2.4	0.806667	0.898146		61	70	1.14754	0.125773	0.354644		61	91	1.4918	0.38108	0.617317		61	97	1.59016	0.6681	0.817374		26	61	2.34615	0.534024	0.730769	0.152376
subject 004	total		61	97	1.59016	0.471379	0.68657		61	66	1.08197	0.0752486	0.274315		60	176	2.93333	1.36222	1.16714		60	132	2.2	0.76	0.87178		47	119	2.53191	0.461747	0.67952	0.14169
subject 005	total		60	157	2.61667	1.33639	1.15602		61	64	1.04918	0.0467616	0.216244		60	82	1.36667	0.665556	0.815816		60	71	1.18333	0.316389	0.562485		12	23	1.91667	0.909722	0.953794	0.19888
subject 006	total		61	156	2.55738	1.23031	1.1092		61	62	1.01639	0.0161247	0.126983		59	145	2.45763	1.46854	1.21183		57	112	1.96491	0.630348	0.793944		38	93	2.44737	0.24723	0.497222	0.103678
subject 007	total		61	191	3.13115	0.868046	0.93169		61	74	1.21311	0.167697	0.409508		61	102	1.67213	1.30234	1.1412		61	83	1.36066	0.427304	0.653685		18	40	2.22222	0.395062	0.628539	0.131059
subject 008	total		60	147	2.45	0.814167	0.902312		56	66	1.17857	0.146684	0.382993		61	95	1.55738	0.705724	0.840074		61	86	1.40984	0.6681	0.817374		23	48	2.08696	1.03592	1.0178	0.212226
subject 009	total		61	136	2.22951	1.02929	1.01454		61	62	1.01639	0.0161247	0.126983		61	101	1.65574	0.947057	0.973169		61	74	1.21311	0.331631	0.575874		23	36	1.56522	0.680529	0.824942	0.172012
subject 010	total		61	137	2.2459	0.808385	0.899102		61	68	1.11475	0.101586	0.318725		61	125	2.04918	1.48938	1.2204		60	114	1.9	1.22333	1.10604		29	83	2.86207	0.739596	0.859998	0.179322
subject 011	total		61	153	2.5082	0.971244	0.985517		61	66	1.08197	0.0752486	0.274315		61	89	1.45902	1.00242	1.00121		61	87	1.42623	0.867509	0.931401		11	37	3.36364	0.231405	0.481046	0.100305
subject 012	total		61	152	2.4918	1.16797	1.08072		61	77	1.2623	0.193496	0.439882		61	148	2.42623	1.3921	1.17987		61	128	2.09836	1.07229	1.03552		43	110	2.55814	0.804759	0.897084	0.187055
subject 013	total		61	133	2.18033	0.803547	0.896408		61	65	1.06557	0.0612739	0.247536		61	106	1.7377	1.14432	1.06973		60	99	1.65	1.09417	1.04602		24	63	2.625	1.15104	1.07287	0.223709
subject 014	total		61	89	1.45902	0.477829	0.691251		61	62	1.01639	0.0161247	0.126983		61	89	1.45902	0.608976	0.780369		61	69	1.13115	0.146735	0.38306		18	26	1.44444	0.358025	0.598352	0.124765
subject 015	total		61	140	2.29508	0.994894	0.997444		61	65	1.06557	0.0612739	0.247536		61	103	1.68852	1.52593	1.23529		61	92	1.5082	1.00403	1.00201		15	46	3.06667	0.862222	0.928559	0.193618
subject 016	total		61	184	3.01639	0.901371	0.949405		61	63	1.03279	0.0317119	0.178078		61	97	1.59016	0.897608	0.947422		61	74	1.21311	0.364418	0.603671		20	33	1.65	0.8275	0.90967	0.189679
subject 017	total		61	172	2.81967	0.803547	0.896408		61	84	1.37705	0.234883	0.484647		61	116	1.90164	1.26901	1.12651		60	93	1.55	0.580833	0.762124		27	59	2.18519	0.521262	0.721985	0.150544
subject 018	total		61	164	2.68852	0.50954	0.713821		61	71	1.16393	0.235421	0.485202		61	93	1.52459	0.741199	0.860929		61	82	1.34426	0.488041	0.698599		19	38	2	0.736842	0.858395	0.178988
subject 019	total		61	165	2.70492	1.2244	1.10653		61	69	1.13115	0.113948	0.337562		61	98	1.60656	0.730449	0.854663		61	89	1.45902	0.67455	0.82131		24	52	2.16667	0.888889	0.942809	0.196589
subject 020	total		61	142	2.32787	0.54824	0.740432		61	66	1.08197	0.0752486	0.274315		59	78	1.32203	0.557311	0.746533		59	62	1.05085	0.048262	0.219686		11	14	1.27273	0.198347	0.445362	0.0928644
subject 021	total		61	155	2.54098	1.16635	1.07998		61	76	1.2459	0.185434	0.430621		61	123	2.01639	1.5899	1.26091		61	82	1.34426	0.422467	0.649975		26	47	1.80769	0.616864	0.785407	0.163769
subject 022	total		61	146	2.39344	0.894383	0.945718		61	73	1.19672	0.158022	0.39752		61	82	1.34426	0.520828	0.721684		61	85	1.39344	0.664875	0.815399		13	37	2.84615	0.43787	0.661717	0.137978
subject 023	total		61	109	1.78689	0.626713	0.791652		61	63	1.03279	0.0317119	0.178078		61	99	1.62295	1.34964	1.16174		61	84	1.37705	0.529965	0.727987		15	38	2.53333	0.382222	0.618241	0.128912
																											22.1739		2.29718				avg
																											9.88411		0.535633				std
																											2.06098		0.111687				ste
			familiarity text German						familiarity misperception German						strength of induced misperceptions German						wittiness uncorrected German						wittiness corrected (only the misperceived ones) German
			n	sum	avg	var	std		n	sum	avg	var	std		n	sum	avg	var	std		n	sum	avg	var	std		n	sum	avg	var	std
subject 001	German		20	45	2.25	0.8875	0.942072		20	21	1.05	0.0475	0.217945		20	33	1.65	0.9275	0.963068		20	31	1.55	0.5475	0.739932		8	19	2.375	0.234375	0.484123
subject 002	German		20	37	1.85	1.2275	1.10793		20	20	1	0	0		19	24	1.26316	0.299169	0.546963		18	23	1.27778	0.311728	0.558326		4	9	2.25	0.1875	0.433013
subject 003	German		20	39	1.95	1.0475	1.02347		20	21	1.05	0.0475	0.217945		20	29	1.45	0.2475	0.497494		20	31	1.55	0.5475	0.739932		9	20	2.22222	0.395062	0.628539
subject 004	German		20	30	1.5	0.75	0.866025		20	20	1	0	0		19	51	2.68421	1.90028	1.37851		19	38	2	0.842105	0.917663		12	31	2.58333	0.409722	0.640095
subject 005	German		20	34	1.7	1.21	1.1		20	20	1	0	0		20	30	1.5	0.85	0.921954		20	25	1.25	0.4875	0.698212		6	11	1.83333	1.13889	1.06719
subject 006	German		20	47	2.35	1.6275	1.27574		20	20	1	0	0		20	60	3	0.9	0.948683		20	46	2.3	0.41	0.640312		18	44	2.44444	0.246914	0.496904
subject 007	German		20	52	2.6	1.04	1.0198		20	22	1.1	0.09	0.3		20	42	2.1	1.79	1.33791		20	30	1.5	0.55	0.74162		9	19	2.11111	0.54321	0.737028
subject 008	German		20	41	2.05	1.0475	1.02347		19	20	1.05263	0.0498615	0.223297		20	34	1.7	0.51	0.714143		20	33	1.65	0.8275	0.90967		11	24	2.18182	0.876033	0.935966
subject 009	German		20	41	2.05	1.4475	1.20312		20	21	1.05	0.0475	0.217945		20	31	1.55	0.5475	0.739932		20	22	1.1	0.09	0.3		8	10	1.25	0.1875	0.433013
subject 010	German		20	39	1.95	0.9475	0.973396		20	24	1.2	0.16	0.4		20	57	2.85	1.4275	1.19478		20	50	2.5	1.45	1.20416		15	45	3	0.933333	0.966092
subject 011	German		20	50	2.5	1.25	1.11803		20	21	1.05	0.0475	0.217945		20	37	1.85	1.4275	1.19478		20	36	1.8	1.26	1.1225		7	23	3.28571	0.204082	0.451754
subject 012	German		20	42	2.1	1.39	1.17898		20	22	1.1	0.09	0.3		20	45	2.25	1.3875	1.17792		20	39	1.95	0.8475	0.920598		13	32	2.46154	0.556213	0.745797
subject 013	German		20	46	2.3	1.21	1.1		20	22	1.1	0.09	0.3		20	40	2	1.4	1.18322		20	38	1.9	1.69	1.3		10	28	2.8	1.76	1.32665
subject 014	German		20	30	1.5	0.55	0.74162		20	20	1	0	0		20	30	1.5	0.75	0.866025		20	24	1.2	0.26	0.509902		6	10	1.66667	0.555556	0.745356
subject 015	German		20	46	2.3	0.91	0.953939		20	24	1.2	0.16	0.4		20	41	2.05	1.8475	1.35923		20	36	1.8	1.36	1.16619		8	24	3	1	1
subject 016	German		20	54	2.7	1.11	1.05357		20	21	1.05	0.0475	0.217945		20	32	1.6	0.94	0.969536		20	25	1.25	0.3875	0.622495		7	12	1.71429	0.77551	0.880631
subject 017	German		20	49	2.45	1.2475	1.11692		20	22	1.1	0.09	0.3		20	32	1.6	0.94	0.969536		20	26	1.3	0.31	0.556776		7	13	1.85714	0.408163	0.638877
subject 018	German		20	59	2.95	0.6475	0.804674		20	25	1.25	0.4875	0.698212		20	32	1.6	0.84	0.916515		20	27	1.35	0.5275	0.726292		7	14	2	0.857143	0.92582
subject 019	German		20	50	2.5	1.55	1.24499		20	23	1.15	0.1275	0.357071		20	35	1.75	0.6875	0.829156		20	31	1.55	0.7475	0.864581		11	22	2	0.909091	0.953463
subject 020	German		20	48	2.4	0.84	0.916515		20	21	1.05	0.0475	0.217945		19	27	1.42105	0.770083	0.877544		19	20	1.05263	0.0498615	0.223297		4	5	1.25	0.1875	0.433013
subject 021	German		20	40	2	1.2	1.09545		20	22	1.1	0.09	0.3		20	42	2.1	1.69	1.3		20	28	1.4	0.44	0.663325		9	17	1.88889	0.54321	0.737028
subject 022	German		20	45	2.25	1.0875	1.04283		20	21	1.05	0.0475	0.217945		20	27	1.35	0.6275	0.792149		20	27	1.35	0.6275	0.792149		4	11	2.75	0.6875	0.829156
subject 023	German		20	34	1.7	1.11	1.05357		20	20	1	0	0		20	29	1.45	1.1475	1.07121		20	27	1.35	0.7275	0.852936		3	10	3.33333	0.222222	0.471405
																											8.52174		2.27212				avg
																											3.65401		0.578287				std
																											0.761913		0.120581				ste
			familiarity text English						familiarity misperception English						strength of induced misperceptions English						wittiness uncorrected English						wittiness corrected (only the misperceived ones) English
			n	sum	avg	var	std		n	sum	avg	var	std		n	sum	avg	var	std		n	sum	avg	var	std		n	sum	avg	var	std
subject 001	English		41	111	2.70732	0.402142	0.634146		41	45	1.09756	0.0880428	0.29672		41	63	1.53659	1.17549	1.0842		41	62	1.5122	0.981559	0.990736		9	30	3.33333	0.222222	0.471405
subject 002	English		41	101	2.46341	0.590125	0.768196		41	41	1	0	0		40	52	1.3	0.51	0.714143		40	51	1.275	0.499375	0.706665		7	18	2.57143	0.816327	0.903508
subject 003	English		40	105	2.625	0.534375	0.73101		41	49	1.19512	0.157049	0.396295		41	62	1.5122	0.444973	0.667063		41	66	1.60976	0.725758	0.851915		17	41	2.41176	0.595156	0.771463
subject 004	English		41	67	1.63415	0.329566	0.574078		41	46	1.12195	0.107079	0.327229		41	125	3.04878	1.07079	1.03479		41	94	2.29268	0.694825	0.833561		35	88	2.51429	0.478367	0.691641
subject 005	English		40	123	3.075	0.769375	0.87714		41	44	1.07317	0.0678168	0.260417		40	52	1.3	0.56	0.748331		40	46	1.15	0.2275	0.47697		6	12	2	0.666667	0.816497
subject 006	English		41	109	2.65854	1.00535	1.00267		41	42	1.02439	0.0237954	0.154257		39	85	2.17949	1.53189	1.23769		37	66	1.78378	0.655953	0.809909		20	49	2.45	0.2475	0.497494
subject 007	English		41	139	3.39024	0.579417	0.761194		41	52	1.26829	0.196312	0.443071		41	60	1.46341	0.931588	0.965188		41	53	1.29268	0.353361	0.594442		9	21	2.33333	0.222222	0.471405
subject 008	English		40	106	2.65	0.5775	0.759934		37	46	1.24324	0.184076	0.429041		41	61	1.4878	0.786437	0.886813		41	53	1.29268	0.548483	0.740596		12	24	2	1.16667	1.08012
subject 009	English		41	95	2.31707	0.801904	0.895491		41	41	1	0	0		41	70	1.70732	1.13385	1.06482		41	52	1.26829	0.440214	0.663486		15	26	1.73333	0.862222	0.928559
subject 010	English		41	98	2.39024	0.676978	0.822787		41	44	1.07317	0.0678168	0.260417		41	68	1.65854	1.05413	1.02671		40	64	1.6	0.84	0.916515		14	38	2.71429	0.489796	0.699854
subject 011	English		41	103	2.5122	0.835217	0.913902		41	45	1.09756	0.0880428	0.29672		41	52	1.26829	0.684117	0.827113		41	51	1.2439	0.574658	0.758062		4	14	3.5	0.25	0.5
subject 012	English		41	110	2.68293	0.948245	0.973779		41	55	1.34146	0.224866	0.474201		41	103	2.5122	1.3718	1.17124		41	89	2.17073	1.16597	1.0798		30	78	2.6	0.906667	0.95219
subject 013	English		41	87	2.12195	0.594884	0.771287		41	43	1.04878	0.046401	0.215409		41	66	1.60976	0.969661	0.984714		40	61	1.525	0.749375	0.865664		14	35	2.5	0.678571	0.823754
subject 014	English		41	59	1.43902	0.441404	0.664382		41	42	1.02439	0.0237954	0.154257		41	59	1.43902	0.538965	0.734142		41	45	1.09756	0.0880428	0.29672		12	16	1.33333	0.222222	0.471405
subject 015	English		41	94	2.29268	1.03629	1.01798		41	41	1	0	0		41	62	1.5122	1.27424	1.12882		41	56	1.36585	0.76859	0.876693		7	22	3.14286	0.693878	0.832993
subject 016	English		41	130	3.17073	0.726948	0.852613		41	42	1.02439	0.0237954	0.154257		41	65	1.58537	0.876859	0.936408		41	49	1.19512	0.352171	0.59344		13	21	1.61538	0.852071	0.923077
subject 017	English		41	123	3	0.487805	0.69843		41	62	1.5122	0.249851	0.499851		41	84	2.04878	1.36347	1.16768		40	67	1.675	0.669375	0.818153		20	46	2.3	0.51	0.714143
subject 018	English		41	105	2.56098	0.392623	0.626597		41	46	1.12195	0.107079	0.327229		41	61	1.4878	0.688876	0.829985		41	55	1.34146	0.468769	0.684667		12	24	2	0.666667	0.816497
subject 019	English		41	115	2.80488	1.0351	1.0174		41	46	1.12195	0.107079	0.327229		41	63	1.53659	0.736466	0.858176		41	58	1.41463	0.632957	0.795586		13	30	2.30769	0.828402	0.910166
subject 020	English		41	94	2.29268	0.402142	0.634146		41	45	1.09756	0.0880428	0.29672		40	51	1.275	0.449375	0.670354		40	42	1.05	0.0475	0.217945		7	9	1.28571	0.204082	0.451754
subject 021	English		41	115	2.80488	0.937537	0.968265		41	54	1.31707	0.216538	0.465336		41	81	1.97561	1.53599	1.23935		41	54	1.31707	0.41166	0.641607		17	30	1.76471	0.650519	0.806548
subject 022	English		41	101	2.46341	0.785247	0.886142		41	52	1.26829	0.196312	0.443071		41	55	1.34146	0.468769	0.684667		41	58	1.41463	0.681737	0.825674		9	26	2.88889	0.320988	0.566558
subject 023	English		41	75	1.82927	0.385485	0.620874		41	43	1.04878	0.046401	0.215409		41	70	1.70732	1.42653	1.19438		41	57	1.39024	0.433076	0.658085		12	28	2.33333	0.222222	0.471405
																											13.6522		2.3319				avg
																											7.35223		0.576418				std
																											1.53305		0.120191				ste

## Sheet: data according to song
			familiarity text						familiarity misperception						strength of induced misperceptions						wittiness uncorrected						wittiness corrected (only the misperceived ones)
n		language	n	sum	avg	var	std		n	sum	avg	var	std		n	sum	avg	var	std		n	sum	avg	var	std		n	sum	avg	var	std
1	ABBA_The Winner Takes It All_cut.wav	e	23	70	3.04348	0.389414	0.62403		23	26	1.13043	0.113422	0.336781		22	31	1.40909	0.514463	0.717261		23	28	1.21739	0.257089	0.507039		6	11	1.83333	0.472222	0.687184
2	A-ha_ Take On Me_cut.wav	e	23	72	3.13043	0.374291	0.611793		23	24	1.04348	0.0415879	0.203931		23	27	1.17391	0.31758	0.563543		23	26	1.13043	0.200378	0.447636		2	5	2.5	0.25	0.5
3	Alicia Keys_No One_cut.wav	e	23	65	2.82609	0.57845	0.760559		23	24	1.04348	0.0415879	0.203931		23	27	1.17391	0.230624	0.480233		23	25	1.08696	0.0793951	0.281771		3	5	1.66667	0.222222	0.471405
4	Avril Lavigne_Nobody's Home_cut.wav	e	23	59	2.56522	0.680529	0.824942		23	25	1.08696	0.0793951	0.281771		23	28	1.21739	0.344045	0.586554		22	23	1.04545	0.0433884	0.208299		2	3	1.5	0.25	0.5
5	Avril Lavigne_Runaway_cut.wav	e	23	31	1.34783	0.400756	0.633053		23	23	1	0	0		23	28	1.21739	0.257089	0.507039		23	26	1.13043	0.113422	0.336781		4	7	1.75	0.1875	0.433013
6	Billy Talent_Fallen Leaves_cut.wav	e	23	56	2.43478	1.28922	1.13544		22	26	1.18182	0.14876	0.385695		23	48	2.08696	1.73157	1.31589		22	35	1.59091	0.78719	0.887237		10	23	2.3	0.81	0.9
7	Blondie_Heart Of Glass_cut.wav	e	23	54	2.34783	0.574669	0.758069		23	29	1.26087	0.192817	0.439109		23	32	1.3913	0.412098	0.641949		23	27	1.17391	0.143667	0.379035		7	11	1.57143	0.244898	0.494872
8	Blue Lagoon_Break My Stride_cut.wav	e	23	61	2.65217	0.748582	0.865206		23	32	1.3913	0.238185	0.488042		23	73	3.17391	1.2741	1.12876		23	60	2.6087	1.02079	1.01034		19	56	2.94737	0.576177	0.759063
9	Bob Marley_ I Shot the Sheriff_cut.wav	e	22	62	2.81818	0.876033	0.935966		23	24	1.04348	0.0415879	0.203931		23	32	1.3913	0.586011	0.765514		23	31	1.34783	0.574669	0.758069		6	14	2.33333	0.888889	0.942809
10	Boney M_Daddy Cool_cut.wav	e	23	58	2.52174	1.11909	1.05787		23	24	1.04348	0.0415879	0.203931		23	25	1.08696	0.166352	0.407862		23	24	1.04348	0.0415879	0.203931		1	2	2	0	0
11	Bruce Springsteen_I'm On Fire_cut.wav	e	23	54	2.34783	0.835539	0.914078		23	26	1.13043	0.113422	0.336781		23	29	1.26087	0.279773	0.528936		22	24	1.09091	0.0826446	0.28748		4	6	1.5	0.25	0.5
12	Carly Simon_Coming Around Again_cut.wav	e	23	37	1.6087	0.412098	0.641949		23	24	1.04348	0.0415879	0.203931		23	48	2.08696	1.29679	1.13877		23	39	1.69565	0.820416	0.905768		12	28	2.33333	0.722222	0.849837
13	Chris Norman_Midnight Lady_cut.wav	e	23	34	1.47826	0.42344	0.650723		23	27	1.17391	0.143667	0.379035		23	27	1.17391	0.143667	0.379035		23	30	1.30435	0.559546	0.748028		4	9	2.25	1.1875	1.08972
14	Commodores_Nightshift_cut.wav	e	23	42	1.82609	0.839319	0.916144		22	22	1	0	0		23	25	1.08696	0.0793951	0.281771		23	25	1.08696	0.0793951	0.281771		2	4	2	0	0
15	Cutting Crew_I Just Died In Your Arms tonight_cut.wav	e	23	70	3.04348	0.302457	0.549961		23	29	1.26087	0.192817	0.439109		23	43	1.86957	1.33081	1.15361		23	35	1.52174	0.858223	0.926403		10	22	2.2	1.16	1.07703
16	Elvis Presley_All Shook Up_cut.wav	e	23	52	2.26087	0.714556	0.845314		23	23	1	0	0		22	24	1.09091	0.0826446	0.28748		23	24	1.04348	0.0415879	0.203931		2	3	1.5	0.25	0.5
17	Enya_May it be_cut.wav	e	23	50	2.17391	0.752363	0.867389		23	24	1.04348	0.0415879	0.203931		23	44	1.91304	0.862004	0.928442		23	40	1.73913	0.975425	0.987636		13	30	2.30769	0.982249	0.991085
18	Fehlfarben_Ein Jahr (es geht voran)_cut.wav	d	23	43	1.86957	0.89603	0.946589		23	24	1.04348	0.0415879	0.203931		23	42	1.82609	1.2741	1.12876		23	35	1.52174	0.68431	0.82723		9	21	2.33333	0.666667	0.816497
19	Groove Coverage_Moonlight Shadow_cut.wav	e	23	70	3.04348	0.563327	0.750551		23	23	1	0	0		23	30	1.30435	0.298677	0.546513		23	27	1.17391	0.143667	0.379035		6	10	1.66667	0.222222	0.471405
20	Heinz Rudolf Kunze_Dein ist mein ganzes Herz_cut.wav	d	23	48	2.08696	0.94896	0.974146		23	23	1	0	0		23	35	1.52174	0.858223	0.926403		23	29	1.26087	0.279773	0.528936		7	13	1.85714	0.408163	0.638877
21	Hildegard Knef_Für mich soll's rote Rosen regnen_cut.wav	d	23	67	2.91304	0.688091	0.829512		23	25	1.08696	0.0793951	0.281771		23	43	1.86957	1.41777	1.1907		23	36	1.56522	0.854442	0.924361		10	23	2.3	1.01	1.00499
22	Hot Chocolate_You Sexy Thing_cut.wav	e	23	66	2.86957	0.461248	0.679152		23	31	1.34783	0.226843	0.47628		23	40	1.73913	1.23629	1.11189		23	38	1.65217	0.835539	0.914078		8	22	2.75	0.4375	0.661438
23	Howard Carpendale_Dann geh doch_cut.wav	d	23	33	1.43478	0.506616	0.71177		23	23	1	0	0		23	37	1.6087	1.10775	1.0525		22	30	1.36364	0.68595	0.828221		7	15	2.14286	1.26531	1.12486
24	Howard Carpendale_Deine Spuren im Sand_cut.wav	d	23	33	1.43478	0.332703	0.576804		23	23	1	0	0		22	32	1.45455	0.61157	0.78203		23	31	1.34783	0.487713	0.698364		7	15	2.14286	0.693878	0.832993
25	Ich & Ich_Pflaster_cut.wav	d	23	70	3.04348	0.73724	0.858627		23	33	1.43478	0.245747	0.495728		23	65	2.82609	1.53497	1.23894		23	60	2.6087	1.19471	1.09303		18	55	3.05556	0.608025	0.779759
26	Juli_Dieses Leben_cut.wav	d	23	73	3.17391	0.491493	0.701066		23	23	1	0	0		23	31	1.34783	0.487713	0.698364		23	26	1.13043	0.200378	0.447636		6	9	1.5	0.583333	0.763763
27	Jürgen Drews_Ein Bett im Kornfeld_cut.wav	d	23	69	3	0.434783	0.65938		23	26	1.13043	0.113422	0.336781		23	43	1.86957	1.41777	1.1907		23	33	1.43478	0.680529	0.824942		9	19	2.11111	0.987654	0.993808
28	Kid Cudi Vs Crookers_Day'n Nite_cut.wav	e	23	49	2.13043	1.24386	1.11528		23	24	1.04348	0.0415879	0.203931		23	60	2.6087	1.54253	1.24199		23	53	2.30435	1.34216	1.15851		16	47	2.9375	0.683594	0.826797
29	Klaus & Klaus_An der Nordseeküste_cut.wav	d	23	70	3.04348	0.650284	0.806402		23	24	1.04348	0.0415879	0.203931		23	55	2.3913	1.02079	1.01034		23	43	1.86957	0.809074	0.899485		18	38	2.11111	0.765432	0.87489
30	Lady Gaga_Just Dance_cut.wav	e	23	64	2.78261	0.865784	0.930475		23	26	1.13043	0.113422	0.336781		23	47	2.04348	1.34594	1.16014		23	38	1.65217	0.574669	0.758069		11	26	2.36364	0.231405	0.481046
31	Maria Mena_Just Hold Me_cut.wav	e	22	58	2.63636	0.77686	0.881396		23	23	1	0	0		23	28	1.21739	0.517958	0.719693		22	23	1.04545	0.0433884	0.208299		2	3	1.5	0.25	0.5
32	Marius Müller-Westernhagen_Rosi (Männer sind so schwach)_cut.wav	d	23	29	1.26087	0.279773	0.528936		23	27	1.17391	0.404537	0.636032		23	42	1.82609	1.01323	1.00659		23	32	1.3913	0.325142	0.570212		11	20	1.81818	0.330579	0.57496
33	Michael Jackson_Bad_cut.wav	e	23	57	2.47826	0.510397	0.714421		23	34	1.47826	0.249527	0.499527		23	42	1.82609	1.36106	1.16664		22	38	1.72727	1.01653	1.00823		9	25	2.77778	0.617284	0.785674
34	Michael Jackson_Dirty Diana_cut.wav	e	23	62	2.69565	0.47259	0.687452		23	27	1.17391	0.143667	0.379035		23	36	1.56522	0.941399	0.970257		23	33	1.43478	0.593573	0.770437		7	16	2.28571	0.77551	0.880631
35	Nickelback_Rockstar_cut.wav	e	23	63	2.73913	0.714556	0.845314		23	25	1.08696	0.0793951	0.281771		23	44	1.91304	1.03592	1.0178		23	36	1.56522	0.767486	0.876063		12	25	2.08333	0.909722	0.953794
36	OMC_How Bizarre_cut.wav	e	23	60	2.6087	0.325142	0.570212		23	25	1.08696	0.0793951	0.281771		22	36	1.63636	1.04959	1.02449		23	32	1.3913	0.499055	0.706438		7	16	2.28571	0.489796	0.699854
37	Outkast_Hey Ya_cut.wav	e	23	65	2.82609	1.01323	1.00659		23	24	1.04348	0.0415879	0.203931		23	34	1.47826	0.858223	0.926403		23	33	1.43478	0.680529	0.824942		5	15	3	0	0
38	Paul McCartney_Hope of Deliverance_cut.wav	e	23	60	2.6087	0.846881	0.920261		23	28	1.21739	0.170132	0.412471		23	29	1.26087	0.279773	0.528936		23	28	1.21739	0.257089	0.507039		5	10	2	0.4	0.632456
39	Peter Alexander_Delilah_cut.wav	d	23	41	1.78261	0.517958	0.719693		23	25	1.08696	0.0793951	0.281771		23	38	1.65217	1.27032	1.12709		23	28	1.21739	0.344045	0.586554		7	12	1.71429	0.77551	0.880631
40	Peter Cornelius_Du entschuldige I kenn di_cut.wav	d	23	43	1.86957	1.24386	1.11528		22	24	1.09091	0.0826446	0.28748		23	32	1.3913	0.412098	0.641949		23	30	1.30435	0.385633	0.620994		7	14	2	0.571429	0.755929
41	Peter Cornelius_Segel im Wind_cut.wav	d	23	29	1.26087	0.453686	0.673562		23	24	1.04348	0.0415879	0.203931		22	37	1.68182	0.762397	0.873153		23	34	1.47826	0.597353	0.772886		10	21	2.1	0.69	0.830662
42	Pink Floyd_Another Brick In The Wall 2_hey dieter_cut.wav	e	23	72	3.13043	0.461248	0.679152		22	23	1.04545	0.0433884	0.208299		23	28	1.21739	0.344045	0.586554		23	25	1.08696	0.0793951	0.281771		3	5	1.66667	0.222222	0.471405
43	Pink Floyd_Another Brick In The Wall 2_ hol ihn unters Dach_cut.wav	e	23	71	3.08696	0.514178	0.717062		23	25	1.08696	0.0793951	0.281771		23	37	1.6087	0.933837	0.966353		23	26	1.13043	0.113422	0.336781		7	10	1.42857	0.244898	0.494872
44	Queen_Flash_cut.wav	e	23	49	2.13043	0.809074	0.899485		23	24	1.04348	0.0415879	0.203931		23	61	2.65217	1.53119	1.23741		23	53	2.30435	1.42911	1.19545		17	47	2.76471	1.12111	1.05882
45	Red Hot Chili Peppers_Dani California_cut.wav	e	23	62	2.69565	0.646503	0.804054		23	25	1.08696	0.0793951	0.281771		23	41	1.78261	0.952741	0.976085		23	31	1.34783	0.487713	0.698364		11	19	1.72727	0.743802	0.862439
46	Robbie Williams_Advertising Space_cut.wav	e	23	65	2.82609	0.491493	0.701066		23	26	1.13043	0.113422	0.336781		23	38	1.65217	0.835539	0.914078		23	31	1.34783	0.3138	0.560178		9	17	1.88889	0.320988	0.566558
47	Roland Kaiser_Santa Maria_Morgen_cut.wav	d	23	38	1.65217	0.835539	0.914078		23	24	1.04348	0.0415879	0.203931		22	39	1.77273	1.17562	1.08426		23	35	1.52174	0.68431	0.82723		9	21	2.33333	0.666667	0.816497
48	Roland Kaiser_Santa Maria_Schritt_cut.wav	d	23	49	2.13043	0.89603	0.946589		23	26	1.13043	0.113422	0.336781		23	79	3.43478	1.02836	1.01408		23	62	2.69565	0.907372	0.952561		20	59	2.95	0.5475	0.739932
49	Rudi Schuricke_Florentinische Nächte_cut.wav	d	23	28	1.21739	0.170132	0.412471		23	26	1.13043	0.113422	0.336781		23	49	2.13043	1.33081	1.15361		23	44	1.91304	1.03592	1.0178		13	34	2.61538	0.698225	0.835598
50	Sade_Smooth Operator_cut.wav	e	23	53	2.30435	1.2552	1.12036		23	27	1.17391	0.143667	0.379035		23	43	1.86957	1.24386	1.11528		23	38	1.65217	0.748582	0.865206		11	26	2.36364	0.595041	0.771389
51	Sean Paul_Gimme The Light_cut.wav	e	23	55	2.3913	0.586011	0.765514		23	25	1.08696	0.0793951	0.281771		23	28	1.21739	0.257089	0.507039		23	27	1.17391	0.230624	0.480233		4	8	2	0.5	0.707107
52	Sesamstraße_cut.wav	d	23	86	3.73913	0.192817	0.439109		23	23	1	0	0		23	34	1.47826	0.94518	0.972203		23	30	1.30435	0.559546	0.748028		5	12	2.4	1.04	1.0198
53	Snap_I've got the power_cut.wav	e	23	64	2.78261	0.431002	0.656507		23	37	1.6087	0.238185	0.488042		22	51	2.31818	1.7624	1.32755		23	41	1.78261	0.778828	0.882512		12	29	2.41667	0.576389	0.759203
54	Stanfour_Wishing You Well_cut.wav	e	22	44	2	0.636364	0.797724		23	25	1.08696	0.0793951	0.281771		23	30	1.30435	0.733459	0.856422		23	27	1.17391	0.31758	0.563543		3	7	2.33333	0.888889	0.942809
55	The Mamas & The Papas_California Dreaming_cut.wav	e	23	73	3.17391	0.57845	0.760559		22	30	1.36364	0.231405	0.481046		23	47	2.04348	1.69376	1.30145		23	34	1.47826	0.510397	0.714421		10	21	2.1	0.49	0.7
56	Theo Lingen_Theodor im Fußballtor_cut.wav	d	23	31	1.34783	0.487713	0.698364		23	24	1.04348	0.0415879	0.203931		23	27	1.17391	0.404537	0.636032		23	27	1.17391	0.404537	0.636032		2	6	3	1	1
57	The Walkers Brothers_The Sun Ain't Gonna Shine Anymore_cut.wav	e	23	38	1.65217	0.574669	0.758069		23	26	1.13043	0.113422	0.336781		23	73	3.17391	1.2741	1.12876		23	59	2.56522	0.941399	0.970257		19	55	2.89474	0.515235	0.717799
58	Tom Astor_Flieg Junger Adler_cut.wav	d	23	40	1.73913	0.801512	0.895272		23	23	1	0	0		23	49	2.13043	0.89603	0.946589		23	44	1.91304	0.94896	0.974146		16	37	2.3125	0.839844	0.91643
59	Train_Drops of jupiter_cut.wav	e	23	58	2.52174	0.597353	0.772886		23	25	1.08696	0.0793951	0.281771		23	43	1.86957	1.41777	1.1907		23	33	1.43478	0.41966	0.647811		9	19	2.11111	0.320988	0.566558
60	UB40_Can't Help Falling In Love_cut.wav	e	23	60	2.6087	0.499055	0.706438		23	26	1.13043	0.113422	0.336781		22	33	1.5	0.977273	0.988571		23	29	1.26087	0.453686	0.673562		5	11	2.2	0.96	0.979796
61	Udo Jürgens_Griechischer Wein_cut.wav	d	23	78	3.3913	0.325142	0.570212		23	23	1	0	0		23	31	1.34783	0.487713	0.698364		23	27	1.17391	0.230624	0.480233		5	9	1.8	0.56	0.748331
																											8.37705		2.17437				avg
		e = English																									4.8654		0.437835				std
		d = German																									0.622951		0.0560591				ste
